# Supplementary material
Source: publisher site journal article supplement (https://www.dovepress.com/article/193528)
Supplement: Supplementary file 1 [file get_supplementary_file.php]

## FPG ASIAN

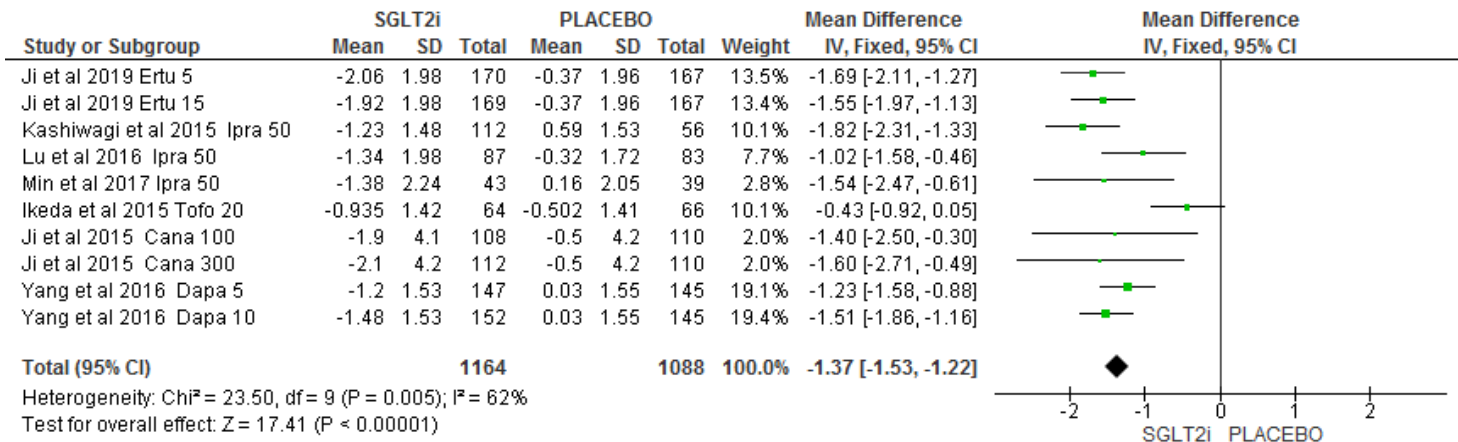

## FPG NON ASIAN

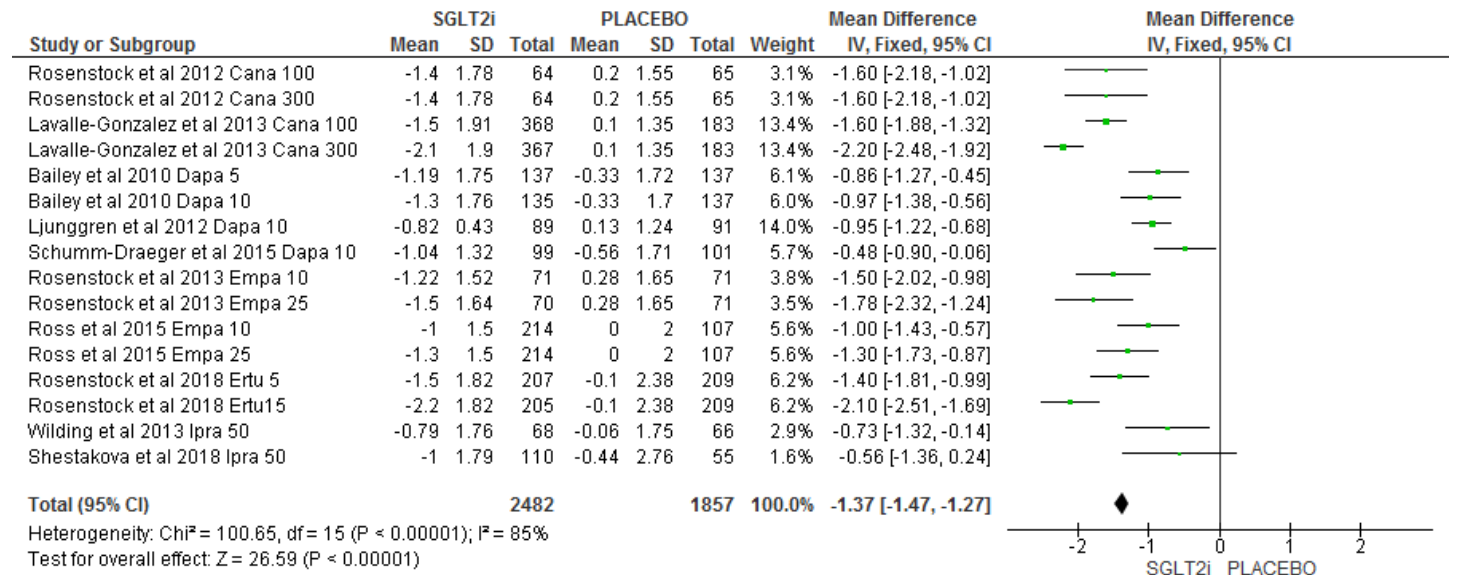

**Figure S1:** Meta-analysis of placebo-controlled randomized clinical trials that investigated the effects of SGLT2is on fasting plasma glucose in Asian and non-Asian patients with T2DM insufficiently controlled on metformin monotherapy.

Cana: canagliflozin. Dapa: dapagliflozin. Empa: empagliflozin. Ertu: ertugliflozin. Ipra: ipragliflozin. Tofo: tofogliflozin.

The figure after each medication name corresponds to the daily dose in mg.

CI: confidence interval. FPG: fasting plasma glucose. IV: inverse variance. SD: standard deviation. SGLT2i: sodium-glucose cotransporter type 2 inhibitor.

## BW ASIAN

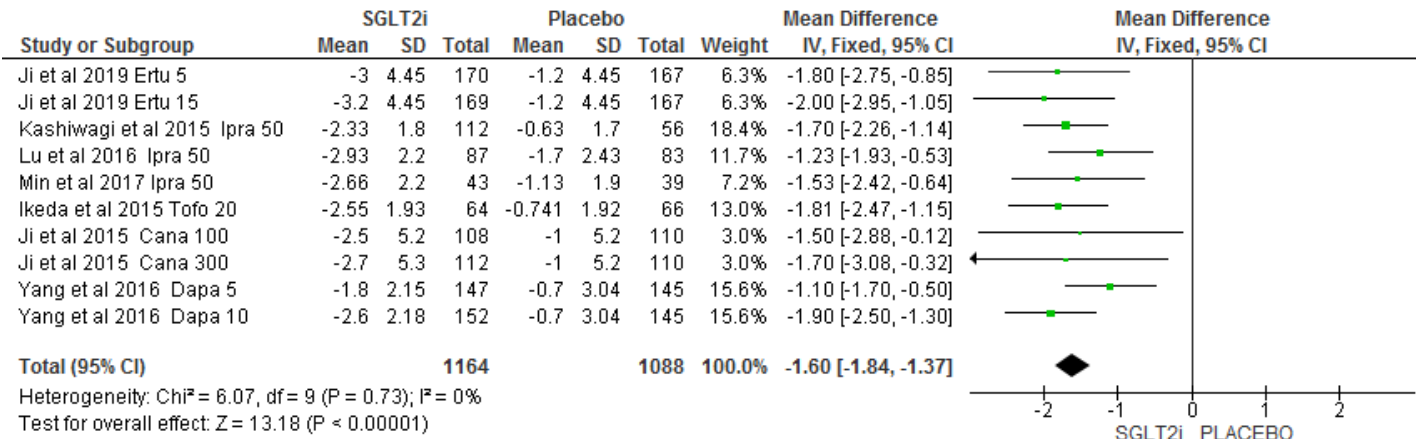

## BW NON ASIAN

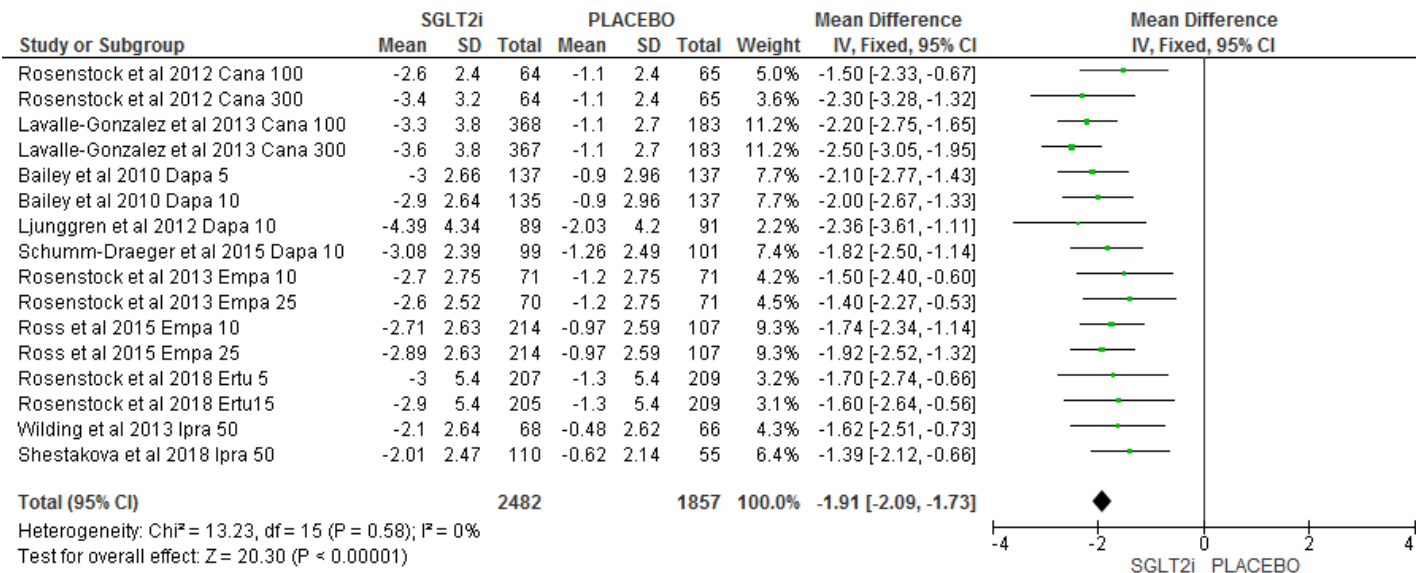

**Figure S2:** Meta-analysis of placebo-controlled randomized clinical trials that investigated the effects of SGLT2is on body weight in Asian and non-Asian patients with T2DM insufficiently controlled on metformin monotherapy.

Cana: canagliflozin. Dapa: dapagliflozin. Empa: empagliflozin. Ertu: ertugliflozin. Ipra: ipragliflozin. Tofo: tofogliflozin.

The figure after each medication name corresponds to the daily dose in mg.

BW: body weight. CI: confidence interval. IV: inverse variance. SD: standard deviation. SGLT2i: sodium-glucose cotransporter type 2 inhibitor.

## SBP ASIAN

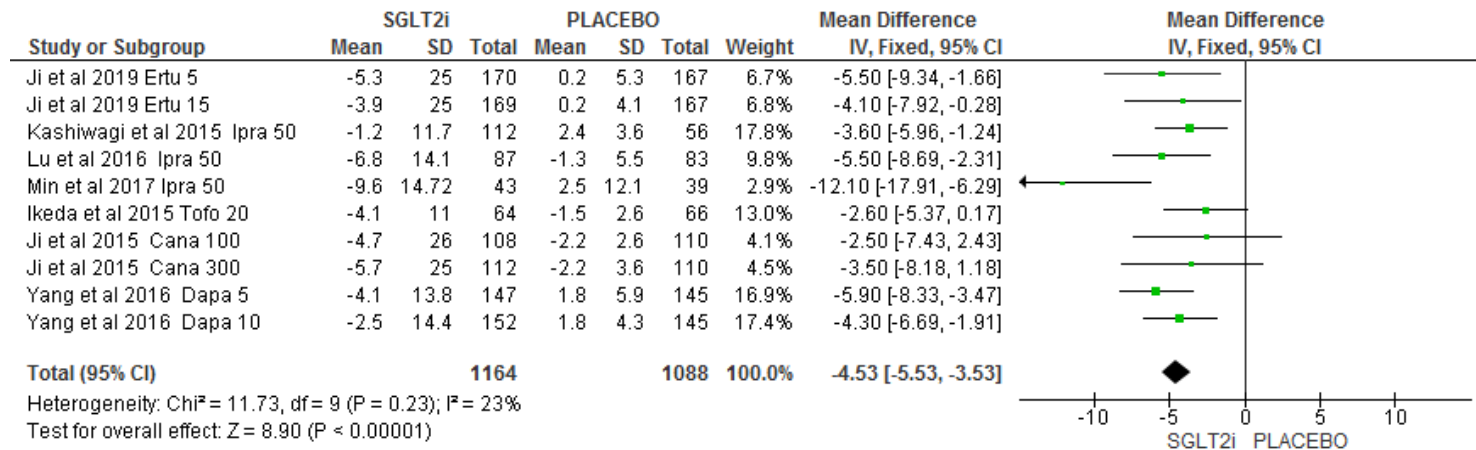

## SBP NON ASIAN

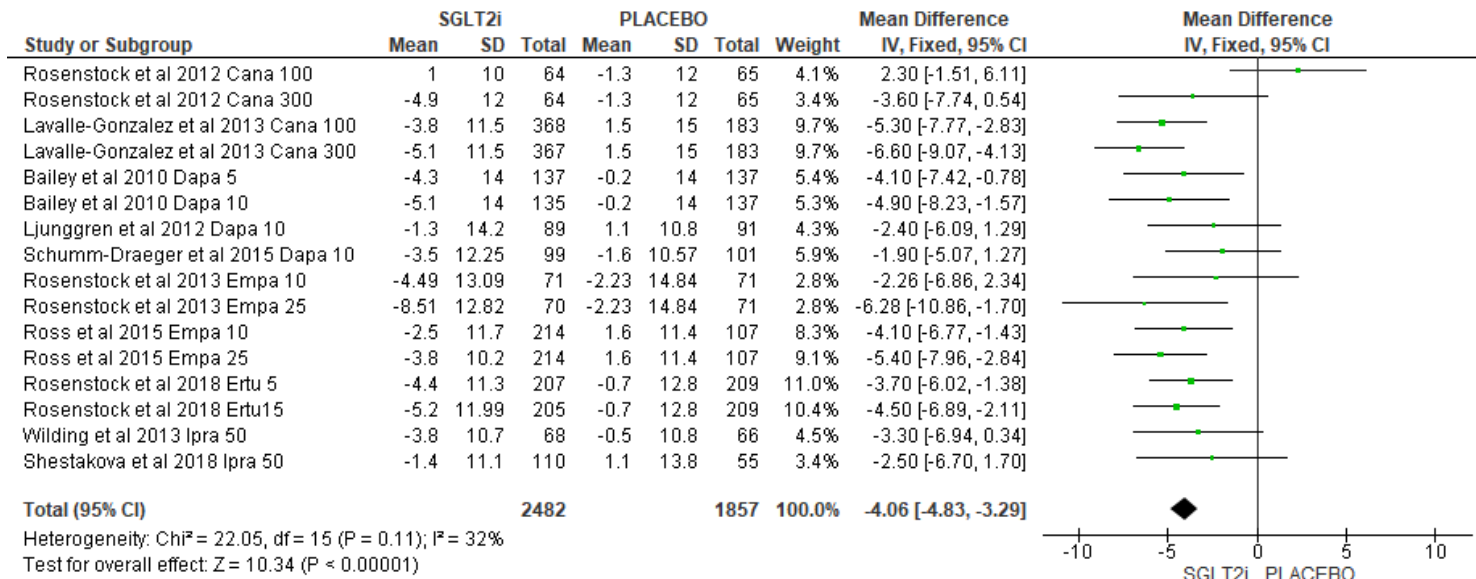

**Figure S3:** Meta-analysis of placebo-controlled randomized clinical trials that investigated the effects of SGLT2is on systolic blood pressure in Asian and non-Asian patients with T2DM insufficiently controlled on metformin monotherapy.

Cana: canagliflozin. Dapa: dapagliflozin. Empa: empagliflozin. Ertu: ertugliflozin. Ipra: ipragliflozin. Tofo: tofogliflozin.

The figure after each medication name corresponds to the daily dose in mg.

CI: confidence interval. IV: inverse variance. SD: standard deviation. SBP: systolic blood pressure. SGLT2i: sodium-glucose cotransporter type 2 inhibitor.
